# Supplementary material for: Studying alternative splicing regulatory networks through partial correlation analysis
Source: PubMed Central journal article supplement (PMC2687791; doi:10.1186/gb-2009-10-1-r3), 2009-01-09

Additional file 1

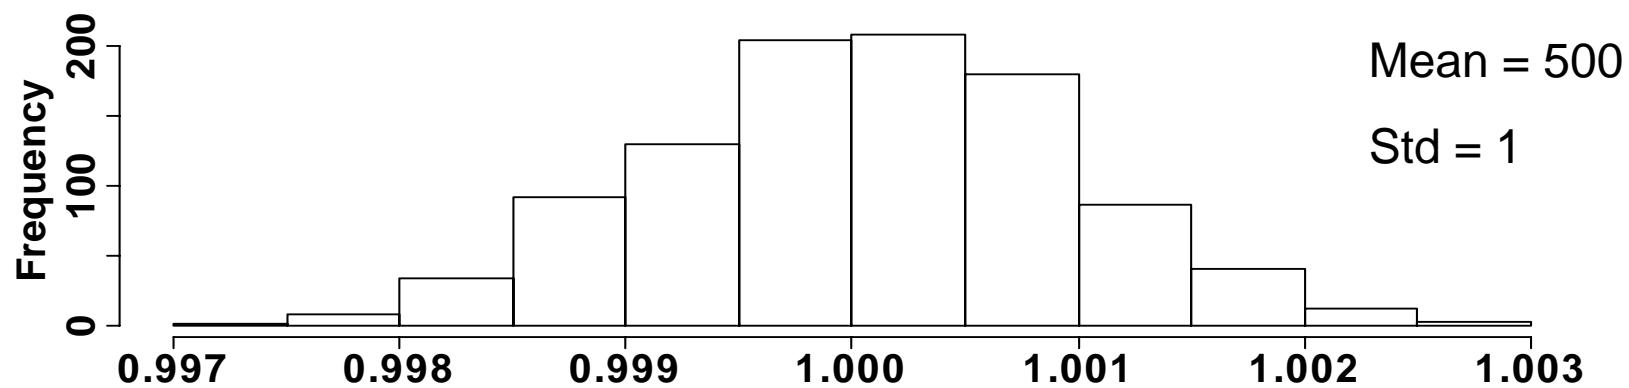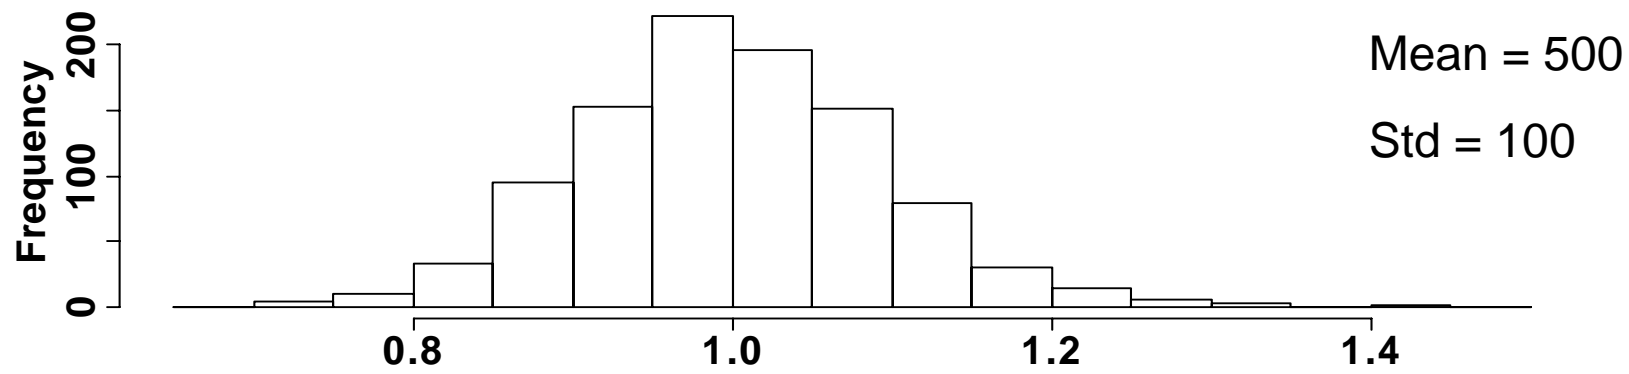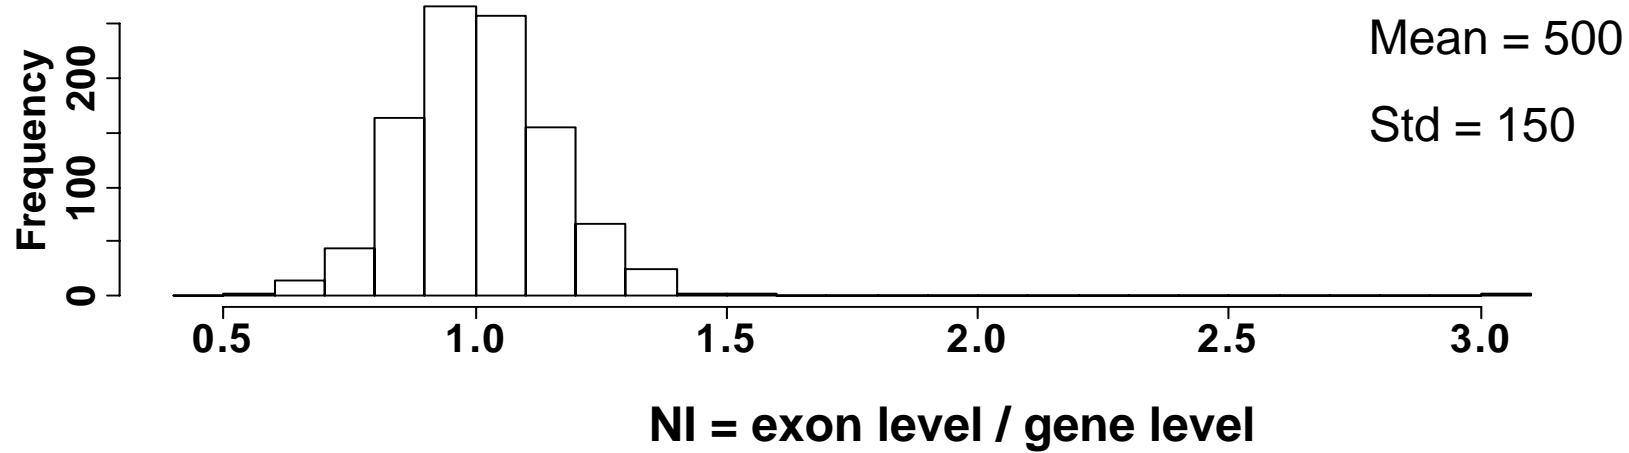

Supplement: gb-2009-10-1-r3-S1.pdf [file gb-2009-10-1-r3-S1.pdf]
