# Supplementary material for: Studying alternative splicing regulatory networks through partial correlation analysis
Source: PubMed Central journal article supplement (PMC2687791; doi:10.1186/gb-2009-10-1-r3), 2009-01-09

# Additional file 2

**A**

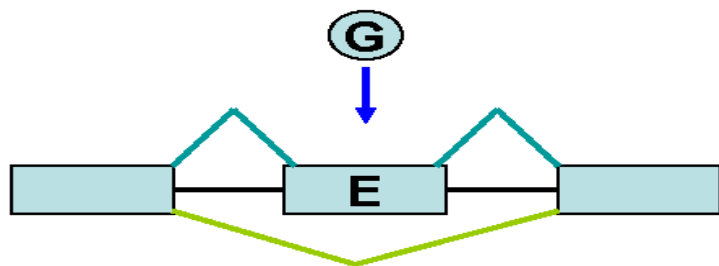

**B**

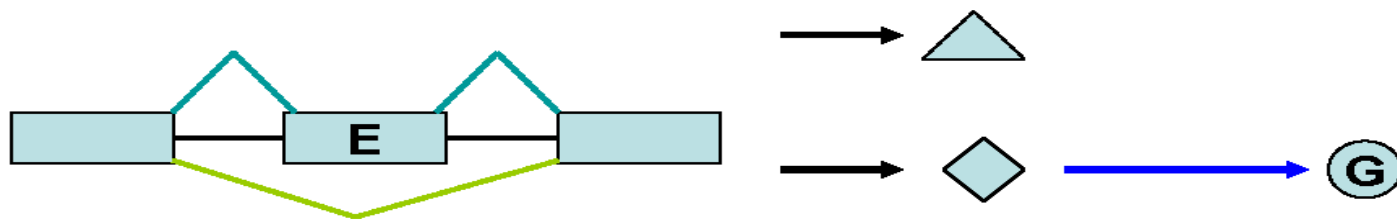

**C**

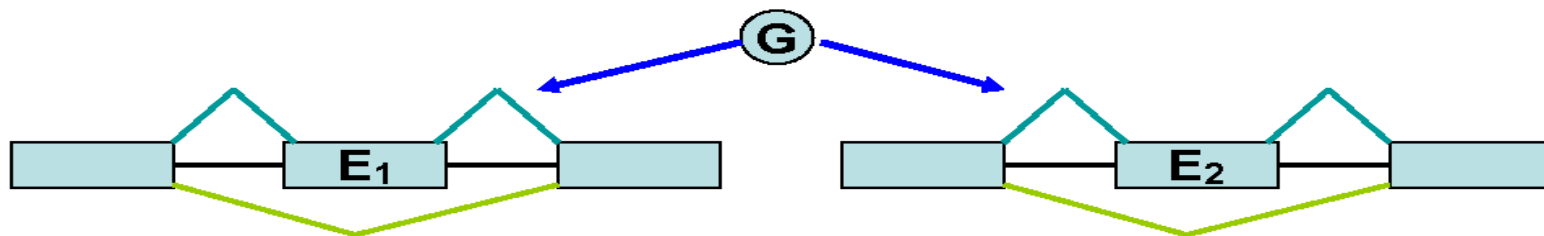

**D**

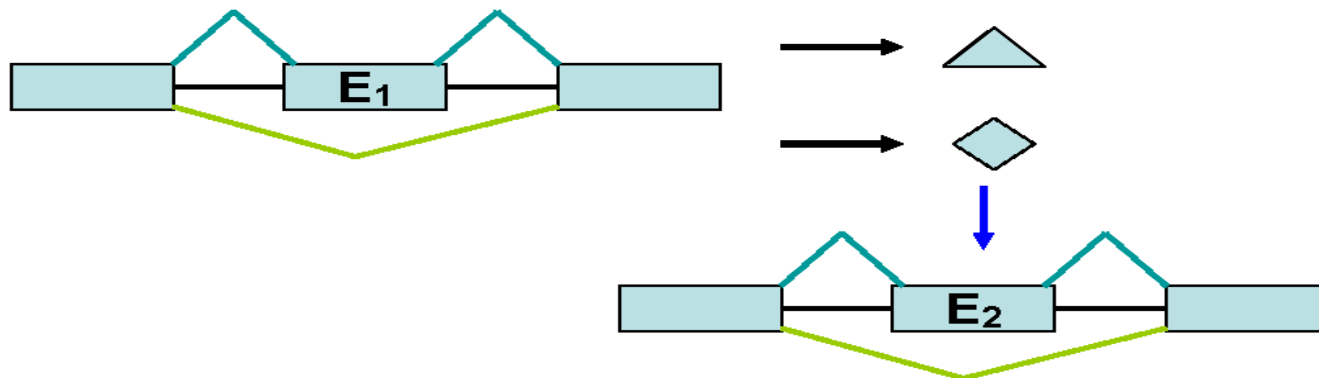

Supplement: gb-2009-10-1-r3-S2.pdf [file gb-2009-10-1-r3-S2.pdf]
