# Supplementary material for: Studying alternative splicing regulatory networks through partial correlation analysis
Source: PubMed Central journal article supplement (PMC2687791; doi:10.1186/gb-2009-10-1-r3), 2009-01-09

Human

Positive correlation

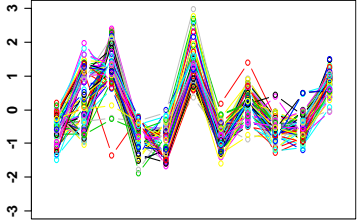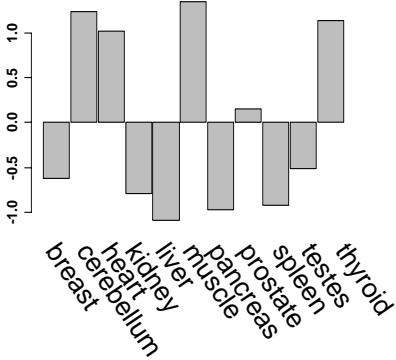

Negative correlation

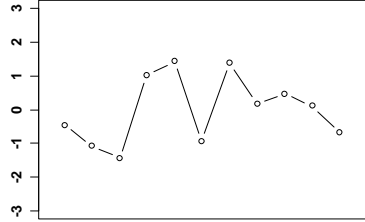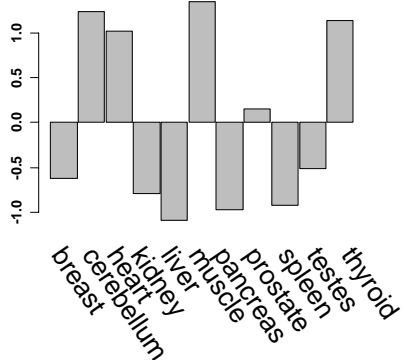

Mouse

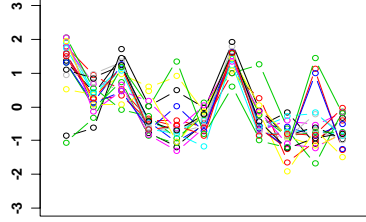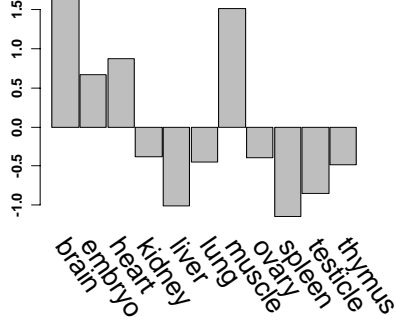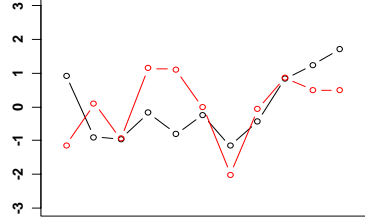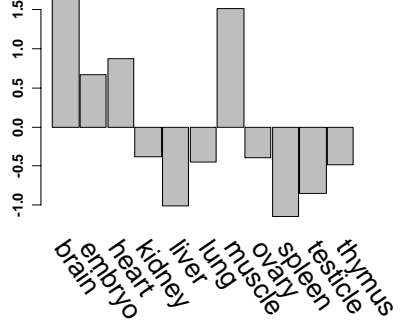

Supplement: gb-2009-10-1-r3-S5.pdf [file gb-2009-10-1-r3-S5.pdf]
